# Supplementary material
Source: Springer Nature journal article supplement (https://www.springermedizin.de/resource/supplementary/12914_2011_213_MOESM5_ESM.pdf/9537040)

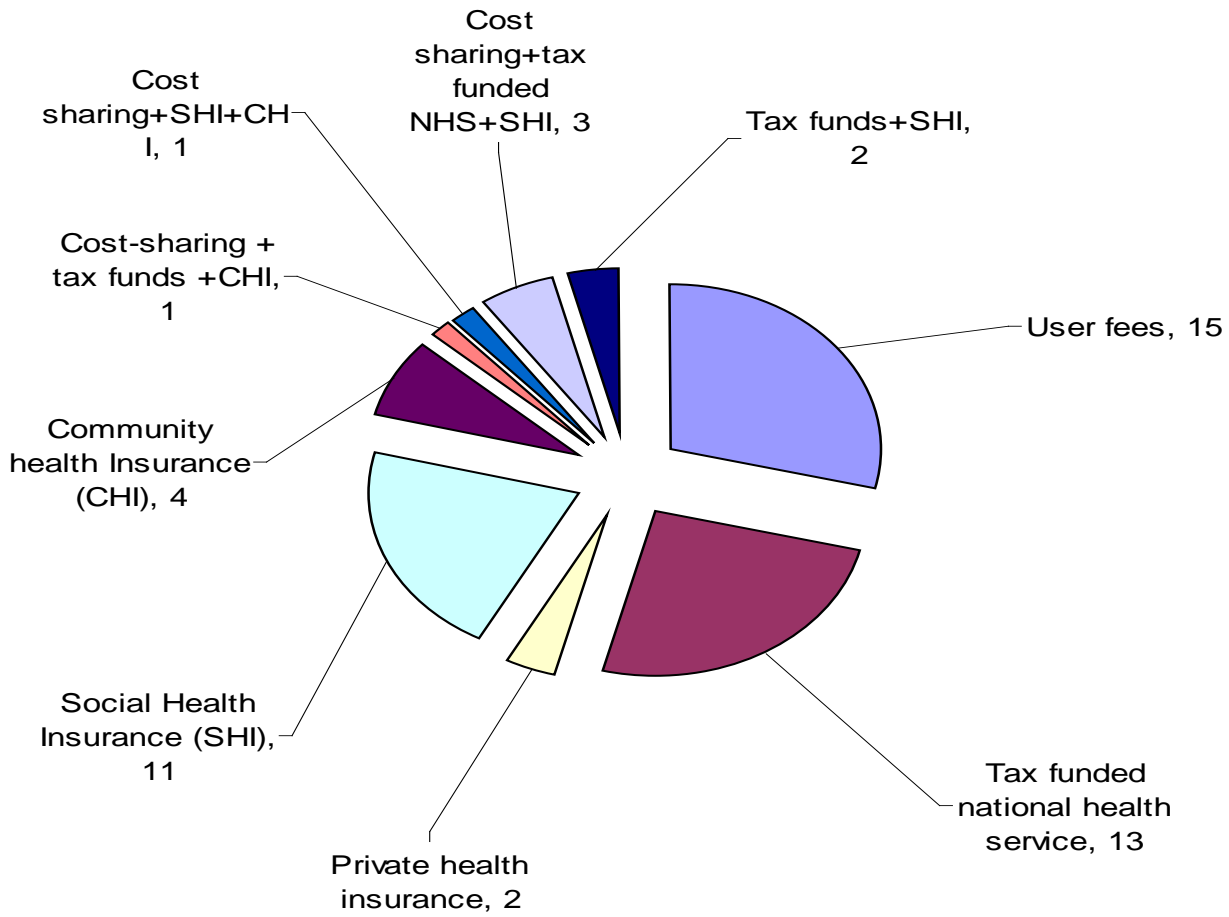

Supplement: MOESM5 [file 9537040]
